# Supplementary material for: Engineering Pichia pastoris for improved NADH regeneration: A novel chassis strain for whole-cell catalysis
Source: PubMed Central journal article supplement (PMC4660914; doi:10.3762/bjoc.11.190), 2015-09-25
Supplement: Beilstein_J_Org_Chem-11-1741-s001.pdf [file Beilstein_J_Org_Chem-11-1741-s001.pdf]

## Supporting Information

for

### Engineering *Pichia pastoris* for improved NADH regeneration: A novel chassis strain for whole-cell catalysis

Martina Geier<sup>1</sup>, Christoph Brandner<sup>1</sup>, Gernot A. Strohmeier<sup>1,2</sup>, Mélanie Hall<sup>3</sup>, Franz S. Hartner<sup>4,5</sup> and Anton Glieder<sup>5\*</sup>

Address: <sup>1</sup>Austrian Centre of Industrial Biotechnology (ACIB GmbH), Petersgasse 14, Graz, 8010, Austria, <sup>2</sup>Institute of Organic Chemistry, Graz University of Technology, Stremayrgasse 9, Graz, 8010, Austria, <sup>3</sup>Department of Chemistry, University of Graz, Heinrichstrasse 28, Graz, 8010, Austria, <sup>4</sup>current address: Sandoz GmbH, Biochemiestrasse 10, 6250, Kundl, Austria and <sup>5</sup>Institute of Molecular Biotechnology, Graz University of Technology, Petersgasse 14, Graz, 8010, Austria

Email: Anton Glieder\* - a.glieder@tugraz.at

\*Corresponding author

### Schematic representation of knock-out cassette architecture and sequences of primers used

## Generation of *das* knock-out strains

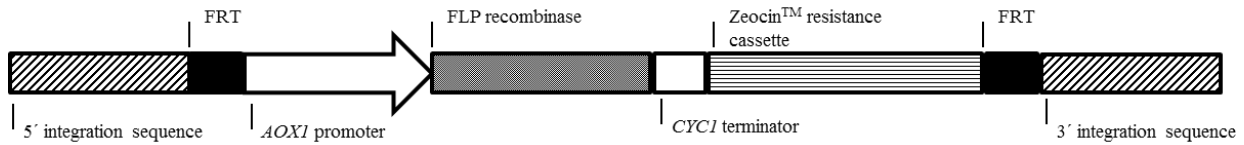

**Figure S1:** Schematic representation of knock-out cassette architecture. The core is composed of a  $P_{AOXI}$  based expression cassette for the FLP recombinase as well as of a Zeocin resistance marker cassette. These parts are surrounded on both sides by recombinase target sequences (FRT) and locus specific integration sequences. Components are not drawn to scale.

**Table S1:** Sequences of primers used for the amplification of the 5'- and 3'- integration sequences of the *das* knock-out cassettes.

| Primer            | Sequence (5' - 3')                                                       |
|-------------------|--------------------------------------------------------------------------|
| 3UTRDAS1F         | TCG GCC GAT CAG GCC ACG GGA AGT CTT TAC AGT TTT<br>AGT TAG               |
| 3UTRDAS1R         | GCA TAT CGT AGT CCA ATT TAA ATT GTC ATA CAG ATC<br>CAA TGC TGC           |
| 5UTRDAS1F         | ATG ACA ATT TAA ATT GGA CTA CGA TAT GCT CCA ATC C                        |
| 5UTRDAS1R         | TCG GCC CTA GTG GCC GTT GTT TGT AAG TAA ACG AAT<br>CAA GAT ACT G         |
| 3UTRDAS2F         | TCG GCC GAT CAG GCC TTT TGA TGT TTG ATA GTT TGA<br>TAA GAG TGA AC        |
| 3UTRDAS2R         | GGA ATA AGC AGA ACT GTA GAT TTA AAT CAA ACT CTT<br>CAT CCA GAC TCT CAT C |
| 5UTRDAS2F         | GAA GAG TTT GAT TTA AAT CTA CAG TTC TGC TTA TTC<br>CCC C                 |
| 5UTRDAS2R         | TCG GCC CTA GTG GCC GTA GAT TTG GCC ACT AAC GGG<br>TTA G                 |
| 3UTRDAS1&2_cleanR | AAG CAG AAC TGT AGA TTT AAA TTG TCA TAC AGA TCC<br>AAT GCT GC            |
| 5UTRDAS1&2_cleanF | TTG GAT CTG TAT GAC AAT TTA AAT CTA CAG TTC TGC<br>TTA TTC CCC           |

**Table S2:** Sequences of primers used to verify the correct insertion of the corresponding *das* knock-out cassettes.

| <b>Primer</b> | <b>Sequence (5' - 3')</b>              |
|---------------|----------------------------------------|
| Up5UTRDAS1F   | TACCCAATTCAGTGGAACCGTTC                |
| Down3UTRDAS1R | CTC TGC TAG TAA GGT ACA TCA TCA CGG TC |
| Up5UTRDAS2F   | GAT GTA AGA CGT GAC GAT GAT TGG        |
| Down3UTRDAS2R | TAA TCC GGA AGT TCT TCT CCT GG         |
| PAox1SeqR     | GGTTTCATTCAACCTTTCGTCTTTGGATG          |
| PucSeqF       | CTTTTTACGGTTCCTGGCCTTTTGC              |

**Table S3:** Sequences of primers used for the verification of the *das* knock-out strains after marker recycling.

| <b>Primer</b>  | <b>Sequence (5' - 3')</b>              |
|----------------|----------------------------------------|
| DAS1_check_fw  | GCAGGATGCCTGATATATAAATCCCAGATGATC      |
| DAS1_check_rev | CATCAGATATTATCATCGCGGCTTACGTAATAAC     |
| DAS2_check_fw  | CCATCCCACCCTAGGATGTCCTACAGG            |
| DAS2_check_rev | CAAGTTCGTTTTAACTTAAGACCAAAACCAGTTACAAC |
